# Supplementary material
Source: PubMed Central journal article supplement (PMC4144419)
Supplement: NIHMS458927-supplement-1.pdf [file NIHMS458927-supplement-1.pdf]

# Supporting Information

## Materials:

All chemical synthesized DNA strands were purchased from Integrated DNA Technologies, Inc. (www. Idtdna.com). The unmodified helper strands ordered in a 96-well plate format, suspended in ultrapure water without purification. All modified strands were ordered from IDT with HPLC purification. Colloidal solution of 10 nm AuNPs was purchased from Ted Pella Inc. Quantum dots Straptavidin conjugates were purchased from Invitrogen with the emission maximum near 585 nm. 100kDa MWCO centrifuge filters purchased from Pall, Inc.

## Supplementary Figures:

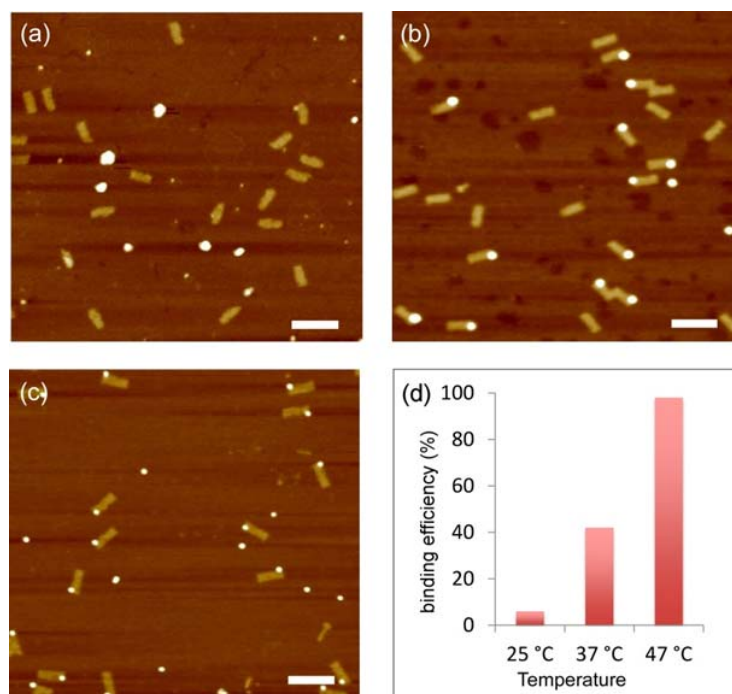

**Figure S1.** AFM images of the assembly of 10 nm AuNPs on DNA origami template as a function of annealing temperature. (a) The mixture of AuNPs and DNA origami was kept at room temperature (25 °C) over 18 hr. (b) Annealed from 37 °C to RT over 18 hr. (c) Annealed from 47 °C to RT over 18 hr. (d) Binding efficiency of AuNPs on the DNA origami template. The binding efficiency of room

temperature is around 6% (N=341), ~42% at 37 °C (N= 467), and 98% at 47°C (N=352). The scale bar is 200 nm.

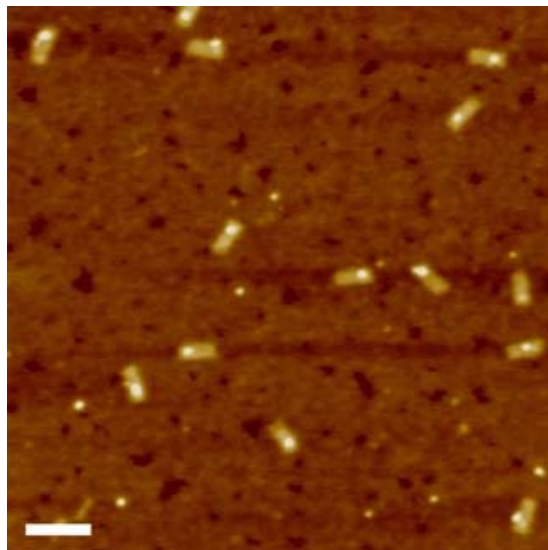

**Figure S2.** AFM image of the attachment of CdSe QDs on DNA origami scaffold after incubation at room temperature over 18 hr. The scale bar is 200 nm.

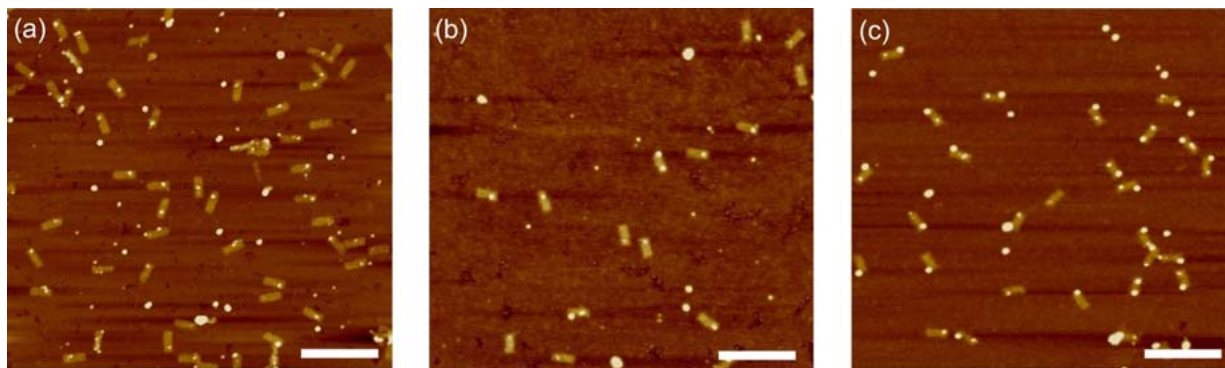

**Figure S3.** AFM images of the single-step assembly of AuNPs and QDs on DNA origami template as a function of annealing temperature. The mixture of DNA origami, AuNPs and QDs was annealed over 18 hr at (a) keeping at room temperature (25 °C). (b) Annealing from 37 °C to RT. (c) Annealing from 47 °C to RT. The scale bar is 400 nm.

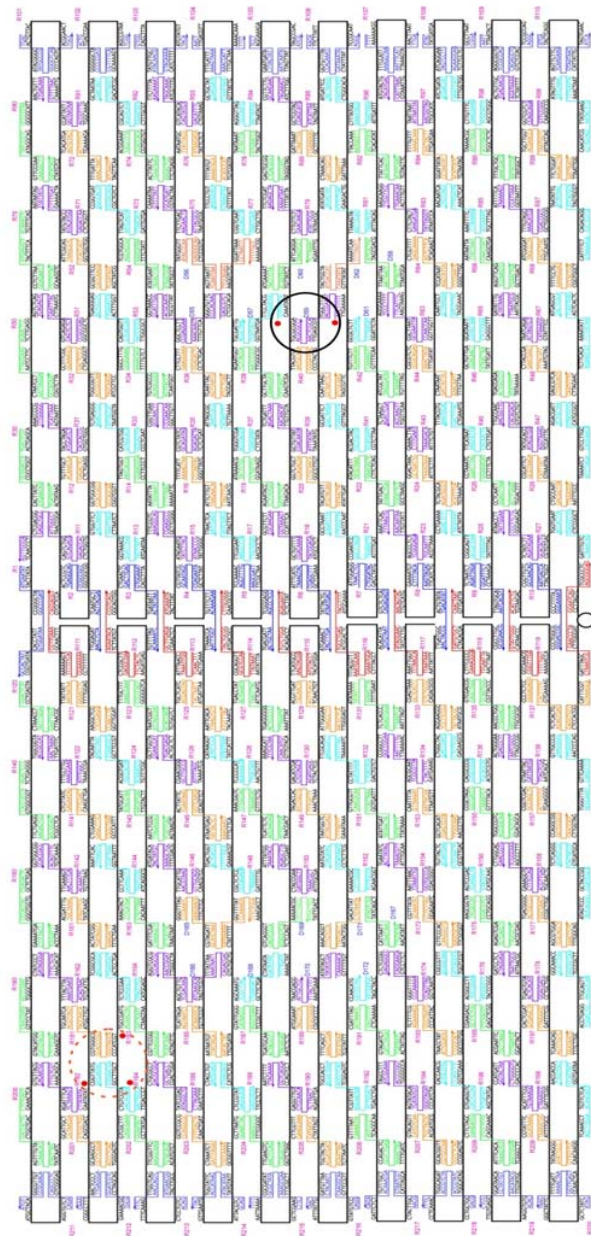

**Figure S4.** Schematic drawing of the rectangle DNA origami with labeled staple strands. The modified strands were marked with small red dots. The dotted red circle shows the anchor position of AuNPs, the solid black circle shows the anchor position of QDs in opposite direction of DNA origami scaffold.

**Sequences of stable strands containing sticky-ends cohesion (from 5' to 3')**

Bio57, 5'-Biotin- TGAGCT GTTTATCACGTAGGAATCATTACCACGCTAAC

Bio59, 5'-Biotin- TGAGCT AACTTTTTTAAAGCCAACGCTCAAACGCGCCT

Au182,

AAAAAAAAAAAAAAAAAGTTGCTTATATATTCTCTAAAGTTTTGTCGTCGTAACACGCAAC

Au183,

AAAAAAAAAAAAAAAAATTTTTACGGCTACTTACTTAGCCGGAACGTCATCAAG

Au184,

AAAAAAAAAAAAAAAAAGTTGCTTACGGTCAAGACAGCATCGGAACGACATAACCGGCAAC

**Sequences of unmodified stable strands**

R1 TATAAGTATAGCCCGGAATAGGTGTATCACCG  
R2 TGAGGCAGCCGCCGCCAGCATTGAATCTCCAA  
R3 GACTTGAGTAAAGGTGAATTATCACTAAAACA  
R4 GCAATAGCATAAGAGCAAGAAACATGGTTTAA  
R5 AGGTTTTGTTAGCGAACCTCCCGAAATCGTCA  
R6 TAAAGTACTTTTCGAGCCAGTAATAAGTTTCAT  
R7 TAACCTCCCATAGGTCTGAGAGACTAATGTGT  
R8 CTTTTACACAGATGAATATACAGTGCCATCAA  
R9 AGATTAGATCTTTAGGTGCACTAAGCAAGGCG  
R10 GCCAACAGACCAGTAATAAAAAGGCGCCAGGG  
R11 CACCAGAGGTCAGACGATTGGCCTCCGTCGAGAGGGTTGA  
R12 ACAAACGACCTCAGAGCCGCCACCGCCAGCAA  
R13 TTATTCATCCATTTGGGAATTAGAAGAACCAC  
R14 AATCACCAAGGGAAGGTAAATATTTTTTTAAG  
R15 GCCCAATATATCTTACCGAAGCCCGACGGAAA  
R16 AAAAGTAAGATAACCCACAAGAATTTAGTTGC  
R17 GAGGCGTTAAGCCTTAAATCAAGATGAGTTAA  
R18 TATTTTGCCTTATCCGGTATTCTAATTCTGT  
R19 AGAGGCATCGACAAAAGGTAAAGTAAGAACGC  
R20 CCAGACGAACAACGCCAACATGTATATAACTA  
R21 ATCAAAATGGCTTAGGTTGGGTAAATTTAGGC  
R22 TATGTAAACTGAGAAGAGTCAATACGGATTTCG  
R23 TTTAACGTTCCGGGAGAAACAATAAGTGAATTT  
R24 CCTGATTGAAAGAAATTGCGTAGAACATTTGA  
R25 CTAAAATAGCCGTCAATAGATAATTTTTTCAGG  
R26 GGATTTAGTAGAAAGGAATTGAGGACCTGAAA  
R27 GTCACACGAGATAGAACCCTTCTGAAGGTTAT  
R28 GCGTAAGATTATTTACATTGGCAGTTAAAGGG  
R29 CTAACAGGAGGCCGAATTCACCA  
R30 TGCTCAGTACCAGGCGGATAAGTGTGATATTC  
R31 GCCACCACATGGATCTTCATTAACGGGGTTT  
R32 GGAAAGCGACCCTCAGAACC GCCATAGCAAGG  
R33 ATTGAGGGGTAGCACCATACCATCCCTCAGA  
R34 CCGGAAACAGACAAAAGGCGACAAGTTACCT  
R35 ATCAGAGAGCAGATAGCCGAACAATTCAACCG  
R36 GAAGGAAAAGTCAGAGGGTAATTGAATCCTGAA  
R37 TATAGAAGACCCACGTACAATTTTGCCTAAT  
R38 TCTTACCAGCGCCCAATAGCAAGCGTTCAGCT  
R39 CATATTTACGACAATAAACAACATAAATCAGA  
R40 AATGCAGACAGTAGGGCTTAATTGATCGCAAG  
R41 TTAAGACGTGCTGATGCAAATCCAAGAATCGC  
R42 ACAAAGAATTGAAAACATAGCGATACAAAATC  
R43 ACAGAAATCTTTGAATACCAAGTTAGCTTAGA  
R44 GCGCAGAGATATCAAAATTATTAGAAAACAATT  
R45 ATCAACACAAGTATTAGACTTTACCACGTAAA  
R46 CGACAATAATCAATATCTGGTCAATATTTTT  
R47 GAAATGGAATACGTGGCACAGACAGTTGGCAA  
R48 GAATGGCTCTACATTTTGACGCTCGAATCTTG  
R49 ATTTTAGACAGGAACGGTACGCCAAATCGTCT  
R50 CCTCAAGAGAAGGATTAGGATTAGGCCAGAAT  
R51 GAGCCGCCAGTCTCTGAATTTACCTGAGACT  
R52 TAAGCGTCCCACCACCGGAACCGCTCGATAGC  
R53 AGCGCCAAGTCACCAATGAAACCACTCCCTCA  
R54 AGCACCGTAATAGAAAATTCATATATAACGGA  
R55 GAGCGTCTGAACACCCTGAACAAACCGAGGAAACGCAATAGGTTTACC  
R56 ATACCAAGACGGGAGAATTAAC TTTCCAGAGCCTAATTTCCGTTTTT

R57 GTTTATCACGTAGGAATCATTACCACGCTAAC  
R60 ATTTTCATACAATAGATAAGTCCTCAAATTCT  
R59 AACTTTTTTAAAGCCAACGCTCAAACGCGCCT  
R62 TACCAGTACAAATATATTTTAGTT  
R61 TAGAATCCCCGCGAGAA  
R58 CGTCGCTATTAATTAATAATTACCT  
R63 AACCAACCGCGAATTATTCATTTCTTTCCCT  
R64 GAGCAAAAACCTCTGAATTATGGACCCGAACG  
R65 AAACCCTCCGTATTAATCCTTTGAGGAATTG  
R66 TTATTAATTCACCAAGCTGAACCTCGAATGA  
R67 GGAAATACATTAGTCTTTAATGCGCAAATATC  
R68 TAGCCCTACATTGCAACAGGAAAAGCCACCGA  
R69 AGAAGTGTTTTTATAATCAGTGAGACGCTCAT  
R70 CTGAAACATGAAAGTATTAAGAGGCGTTCCAG  
R71 AACCAGAGATACATGGCTTTTGATCTATTATT  
R72 AGTGTACTTCTTTTCATAATCAAAATCAAGTT  
R73 TCACAATCAATCAGTAGCGACAGAATCACCGG  
R74 TGCCTTTAACACCACGGAATAAGTAAGACTCC  
R75 GCGCATTAAAGAACTGGCATGATTTTATTTTG  
R76 TTATTACGAGAGAATAACATAAAAAACAGCCAT  
R77 CAAGCAAGGCCAGTTACAAAATAAACAGGGAA  
R78 ATTATTTAACCAAGTACCGCACTCATCCCATC  
R79 GCGTTATAGAACAAGAAAAATAATATCGAGAA  
R80 CTAATTTAGAAAAAGCCTGTTTAGCTAAATTT  
R81 CTGTAAATAATTTTCATCTTCTGACTATCATAT  
R82 AATGGTTTATATGTGAGTGAATAAACATCAAG  
R83 TGGATTATGAAGATGATGAAACAACCTTGCTT  
R84 AAAACAAATTCATCAATATAATCCACATTATC  
R85 CTAAAGCATTAAAAAGTTTGAGTATGATTGTT  
R86 ATTTTGCGGAGAGCCAGCAGCAAAAATACCGA  
R87 CCGCCAGCAAACATCGCCATTAATGAAAAAT  
R88 ACGAACCACTGGTAATATCCAGAAAAATTAACC  
R89 GTAAAAGAGTCTGTCCATCACGCACAATATTA  
R90 AATGCCCCCTGCCTATTTTCGGAACGATACAGG  
R91 GTTTGCCAGGTAATAAGTTTTAACAAACAGTT  
R92 ACGCAAAGGCGTCAGACTGTAGCGTTATTAGC  
R93 CTTTACAGCAGTATGTTAGCAAACATAAAGAA  
R94 GGTATTAATCCCAATCCAAATAAGATAGCAGC  
R95 AATTACTACGAGCATGTAGAAACCCAAGAACG  
R96 AAATCAATGAAATACCGACCGTGTGGAATCAT  
R97 GATGGCAAATTAATTACATTTAACCAAGTACAT  
R98 GCCACGCTGAACAAAGAAACCACCTATCAGTA  
R99 CGGCCCTTGCCAGCAGAAGATAAAAGCAACAGT  
R100 GTTGTAGCAATACTTCTTTGATTACAAACTAT  
R101 CAGTGCCCGTATGGGGTCAGTGCC  
R102 GTCATAGCCCCCGTTTTTCATCGG  
R103 GGTGGCAACATAGTAGAAAATACA  
R104 TCAAAAATGAAAAACGATTTTTT  
R105 TCCTTATCATTCAATCAATAATCG  
R106 AGAATAAACACCGATAAATAAGGC  
R107 TTTTAATGGAAAAATTTCAATTTGA  
R108 CATATTCCTGATAGAAGGAGCGGA  
R109 TTAACACCGCCTCAGAGGTGAGGC  
R110 AGTAGAAGAACTGTAATAACATCA  
R111 AAAAAAGGTTTTTTTACGTTGAAACAGGAGGT  
R112 CTCATCTTGAGGCGAAAGAATACACCGTCACC  
R113 TTTCAACTTAAATTGGGCTTGAGAATGAAATA  
R114 TAAATATTGCGTCCAATACTGCGGCTTGCGGG  
R115 TCCATGTAAAGTACGGTGTCTGGAAGAGAATA  
R116 AGGTAAAGAAATGCAATGCCTGAGTACCTTTT  
R117 AAATAATTTTTAACCAATAGGAACAACAGTAC  
R118 ATTAAGTTGAAAGGGGGATGTGCTCAACTAAT

R119 TGGTTTTTCGGTTTTGCGTATTGGGACATTCTG  
R120 TACTCAGGAGGTTTATGAATTGCG  
R121 AATAATAACTCCAAAAGGAGCCTTCCAACCTA  
R122 TCGGTTTTAAAAGGAACAATAAGTACCGCCA  
R123 AAACGAAATGACCCCCAGCGATTAACACCAGA  
R124 GCGAAACATGCCACTACGAAGGCATAATTGTA  
R125 ACGAGTAGTTAATCATTGTGAATTATGTTTAG  
R126 CGATTTTAGCTTGCCCTGACGAGATACCAAGC  
R127 ACTGGATACATTGAATCCCCCTCATTAAATA  
R128 AAACAGTTAGGGGGTAATAGTAAAACCTTATG  
R129 TGCAACTAACAGTTGATTCCCAATAACCCTCA  
R130 CGAGTAGACTGTAGCTCAACATGTAATGCTTT  
R131 TATATTTTATTCAAAAAGGTGAGATTAAATCA  
R132 AGACAGTCGGATAAAAAATTTTAGTCTGCGAA  
R133 GCTCATTTTCGCGTCTGGCCTTCCTTATTACGC  
R134 CTTTCATCTCGCGTTAAATTTTGAAGGCCGG  
R135 CAGCTGGCGGGTAACGCCAGGGTTAACGCGCG  
R136 CACGACGTGTGCGGGCCTCTTCGCGTAGCCAG  
R137 GGGAGAGGGCTTTTACCAGTGAGAGAGGTGCCGTAAAGCA  
R138 AGCTGATTCATTAATGAATCGGCCTTCCCAGT  
R139 CTAATCGGAACCCTAGGAATCAGAGCGGGAG  
R140 CCCTCAGAACCGCCACCCTCAGAAAGCGGAGT  
R141 GAGAATAGTCAGCTTGCTTTCGAGCGGGTAAA  
R142 CTTAAACAAACTTTCAACAGTTTCCCGCCACC  
R143 ATACGTA AAAAGTACAACGGAGATTTTCATTCAG  
R144 CGCCTGATGGAAGTTTCCATTAAGTGAATTT  
R145 TGAATAAGAGAACTGGCTCATTATAAAGAAGT  
R146 GGACGTTGAACGTAACAAAGCTGCTGTATCAT  
R147 TTTGCCAGCAGAAAACGAGAACGAATTGCTGA  
R148 CAAAAATCGCGAGAGGCTTTTGAACCCAGTCA  
R149 ATCTGGTGTTTAGTTTGACCATTACTTTATTT  
R150 TCGCAAATGATGGCTTAGAGCTTACCATAAAT  
R151 CAACGCAAAAATCACCATCAATATAATATTTT  
R152 ACCGTTCTCTTTTTCGCGGAGAAAGCGATACATT  
R153 GTTAAAATAACATTAATGTGAGCTTGGGAAG  
R154 ACCCGTGGTTAAATTGTAAACGTTGATATTCA  
R155 GGCGATCGTGTA AAAACGACGGCCACCTGTCGT  
R156 CTTGCATGTCAGGCTGCGCAACTGGAGTAACA  
R157 GCCAGCTGGCCCTTACCAGCTGGGAACCATC  
R158 GAGTTGCACTTTCAGTCGGGAAAGTGCCAAG  
R159 ACCCAAATCAAGTTTTTTGGGGTCCGGGCAAT  
R160 CTCAGAGCCACCACCCTCATTCTGGGATTT  
R161 TGCTAAACGCTTGATACCGATAGTAAAGACTT  
R162 CAATGACAAAATGAATTTTCTGTAAGGGATAG  
R163 TTTTCATGAAAATTGTGTCGAAATCATTATTA  
R164 GCTCCATGAGAGGCTTTGAGGACTTGCGCCGA  
R165 CCCAAATCGGAAGAAAAATCTACGGATAAAAACCAAATAAGGTCTTT  
R166 CAGACGACTTAATAAAACGAACTATCGACAAGAACCGGATCGCGACCT  
R169 ACCCTGACAGAGGTCATTTTTGCGGGTCAATA  
R168 TTTTGATATATTATAGTCAGAAGCTCGTTTAC  
R171 ACCTGTTTTTATGACCCTGTAATA  
R170 CAAAAACAAGCTATATTTTCATTTATTGCTCC  
R167 AGCTGATAAATTAATGTTGTATAA  
R172 GGTAGCTAGGTTGTAC  
R173 GCAAATATGATTCTCCGTGGGAACAAGCGCCA  
R174 GATTGACCCCCAAAACAGGAAGACCGGAGAG  
R175 TTCGCCATCCTGCAGGTCGACTCTTTGCGCTC  
R176 CCCGGGTATGCCGAAACCAGGCAAAACGGCG  
R177 ACTGCCCCGCAAGCGGTCCACGCTAAACCGTC  
R178 CCAGCAGGACTCACATTAATTGCGAGAGGATC  
R179 TATCAGGGCGATGGCCCACTACGTCCCTGAGA  
R180 CAAGCCAATAGGAACCCATGTACCTTTCCAG

R181 ACGTTAGTACAACCATCGCCCACGGGGTAGCA  
R182 ATATATTCTCTAAAGTTTTGTCGTCGTAACAC  
R183 ACGGCTACTTACTTAGCCGGAACGTCATCAAG  
R184 ACGGTCAAGACAGCATCGGAACGACATAACCG  
R185 AGTAATCTACGGAACAACATTATTAACACTAT  
R186 AAAGATTCATAGGCTGGCTGACCTAGGGCGCAG  
R187 CATAACCCAAAGCGGATTGCATCATTAGAGAG  
R188 AAGAGGAAGAGGCATAGTAAGAGCACAGGTAG  
R189 TACCTTTAGGGGCGCGAGCTGAAAAGCATAAA  
R190 TCAATTCTCTCCAACAGGTCAGGAAAAAAGATT  
R191 GCTAAATCTTTTTGAGAGATCTACTGATAATC  
R192 TCAGGTCAAGCAATAAAGCCTCAGAGGTGGCA  
R193 AGAAAAGCGTAATGGGATAGGTTACCGGCACC  
R194 TAGATGGGTCATATGTACCCCGGTAAAGGCTA  
R195 GCTTCTGGCCGAGCTCGAATTCGTCCTAATGA  
R196 TCATAGCTCACTCCAGCCAGCTTTCGTTGGTG  
R197 GTGAGCTACGAAAATCCTGTTTGAAAAGAACG  
R198 CCGAAATCTGTAAAGCCTGGGGTGAATCATGG  
R199 TGGACTCCAACGTCAAAGGGCGAAGGTTTGCC  
R200 TGAGTTTCGTCACCAGTACAACTATAGTTAG  
R201 CGTAACGAGGTCGCTGAGGCTTGACCCCTCAG  
R202 CAGCGAAATCATAAGGGAACCGAATGTACAGA  
R203 CCAGGCGCATCAGTTGAGATTTAGCGCCAAAA  
R204 GGAATTACGCCCAGAAAGACTTCAACCAGACCG  
R205 GAAGCAAACTAATAGTAGTAGCAAGAATTAG  
R206 CAAAATTATTGCCTGAGAGTCTGGAAAAGTAG  
R207 CATGTCAACGCATCGTAACCGTGCGGCCTCAG  
R208 GAAGATCGGTTTCCTGTGTGAAATAGCCGGAA  
R209 GCATAAAGGGCAAAATCCCTTATAGTTGTTCC  
R210 AGTTTGGAACAAGAGTCCACTATTTGGTGGTT  
R211 CAGACAGCCCTCACAACGCCTGTA  
R212 TGCGGGATCGTCAGGGAGTTAAAG  
R213 ACAGATGAACGGCTGACCAACTTT  
R214 GCAGATACATAAGAATACCACATT  
R215 CTTCAAAGCGAAATATCGCGTTTT  
R216 CAGGCAAGGCAATTAACATCCAAT  
R217 AACGGTAATCGTAGCAAACAAGAG  
R218 GACGACCGTATCATCTGCCAGTTT  
R219 ACACAACATACGTGTTATCCGCTC  
R220 ATAGGGTTGAGTAATCAAAAAGAAT

References:

- (1) Rothemund, P. W. Nature 2006, 440, 297.
- (2) Ding, B.; Deng, Z.; Yan, H.; Cabrini, S.; Zuckermann, R. N.; Bokor, J. Journal of the American Chemical Society 2010, 132, 3248.
